# Supplementary material for: Circulating Phospholipid Patterns in NAFLD Patients Associated with a Combination of Metabolic Risk Factors
Source: PubMed Central journal article supplement (PMC5986528; doi:10.3390/nu10050649), 2018-05-21
Supplement: nutrients-10-00649-s001.pdf [file nutrients-10-00649-s001.pdf]

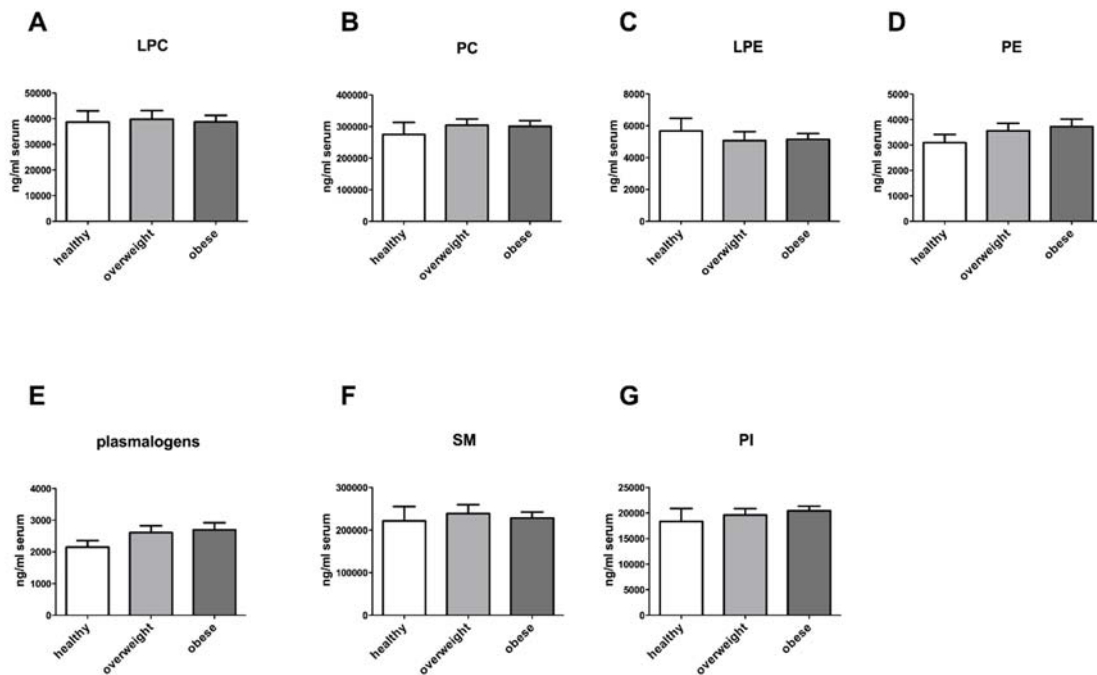

**Supplementary Materials Figure S1.** Comparison of phospholipid subclasses in NAFLD-associated obesity. NAFLD patients were divided in three groups based on their BMI values: obese patients with BMI > 30 kg/m<sup>2</sup> included 28 patients. Patients with BMI value 25–30 kg/m<sup>2</sup> (*n* = 27) were considered as overweight. 8 patients had a BMI < 25 kg/m<sup>2</sup> and were regarded as healthy.

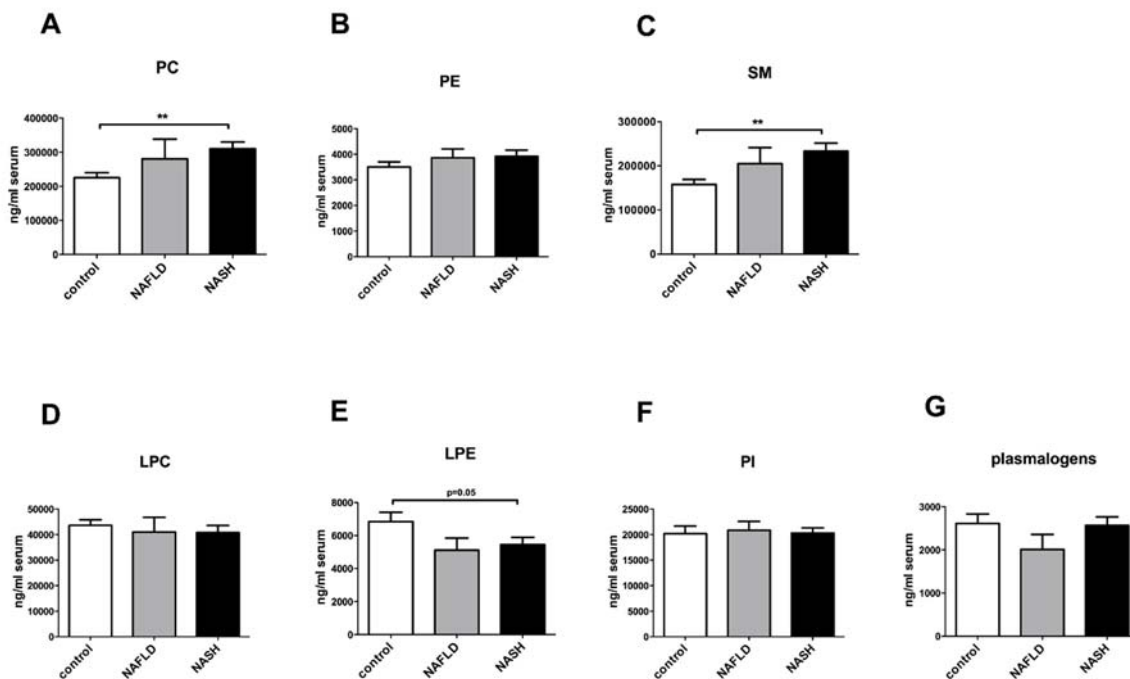

**Supplementary Materials Figure S2.** Quantification of PL species in healthy controls (*n* = 28), NAFL (*n* = 5) and NASH (*n* = 34) cohorts. Patients were grouped in NAFL and NASH cohorts based on the histological results of their liver biopsies (A-D) Lipid levels in these groups were represented in bars (x-axis) in ng/mL serum (y-axis). All values are presented in mean ± SEM. \* *p* < 0.05, \*\* *p* < 0.01.
